# Supplementary figures and images for: High Seroprevalence of SARS-CoV-2 in Mwanza, Northwestern Tanzania: A Population-Based Survey
Source: MDPI journal article supplement (doi:10.3390/ijerph191811664), 2022-09-16

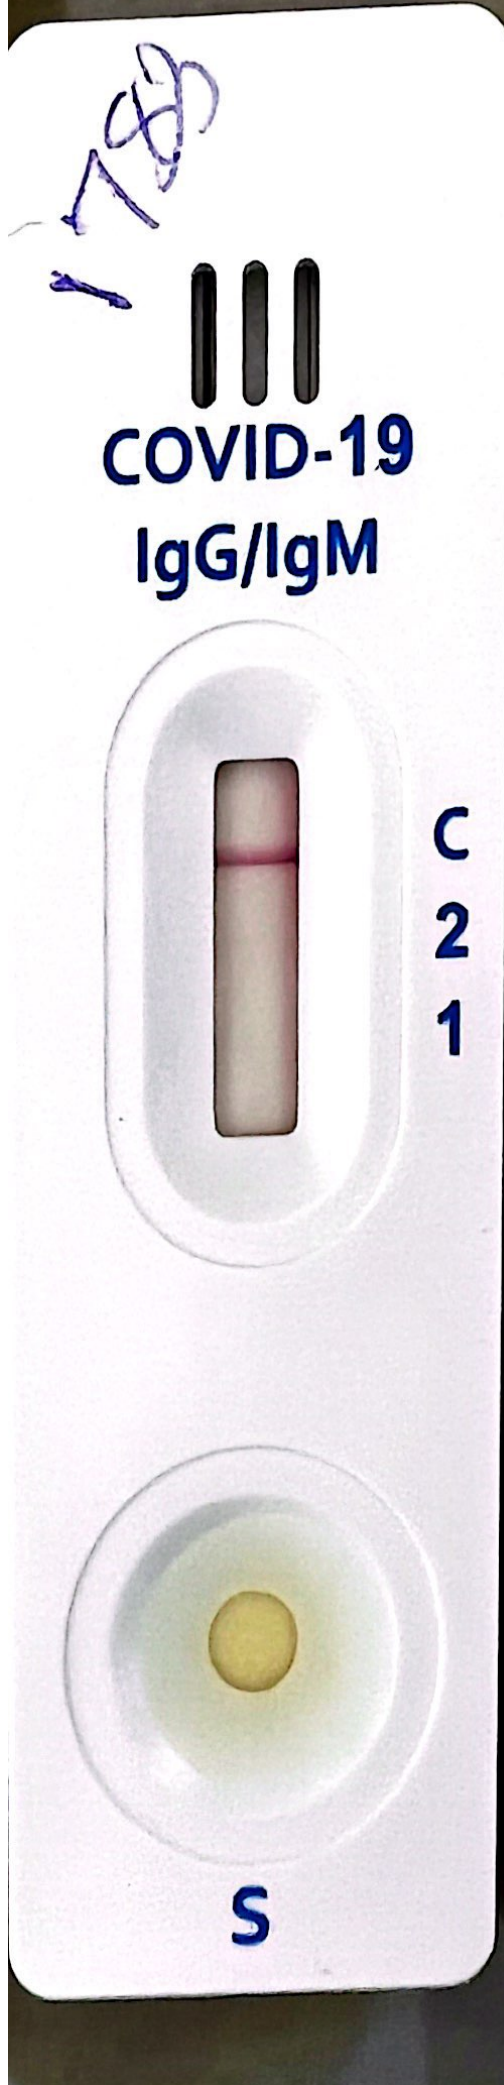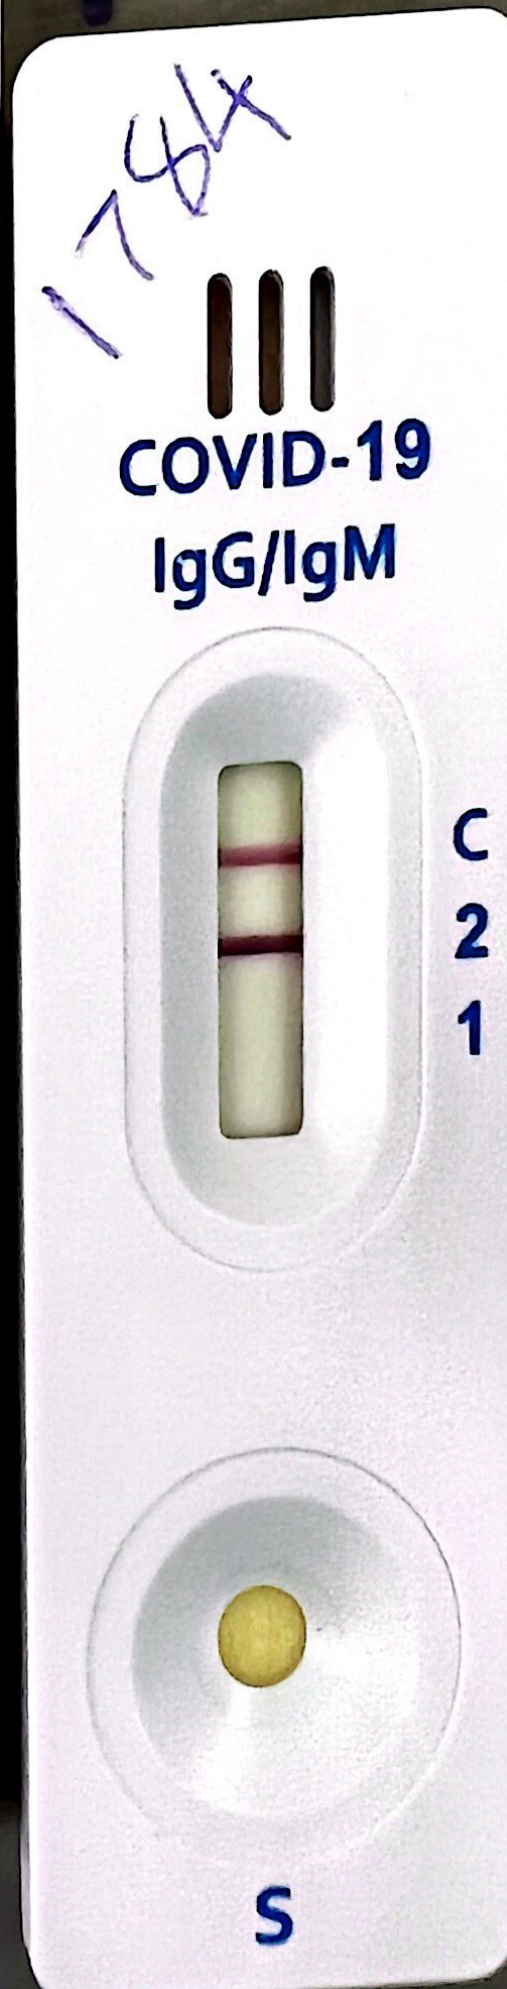

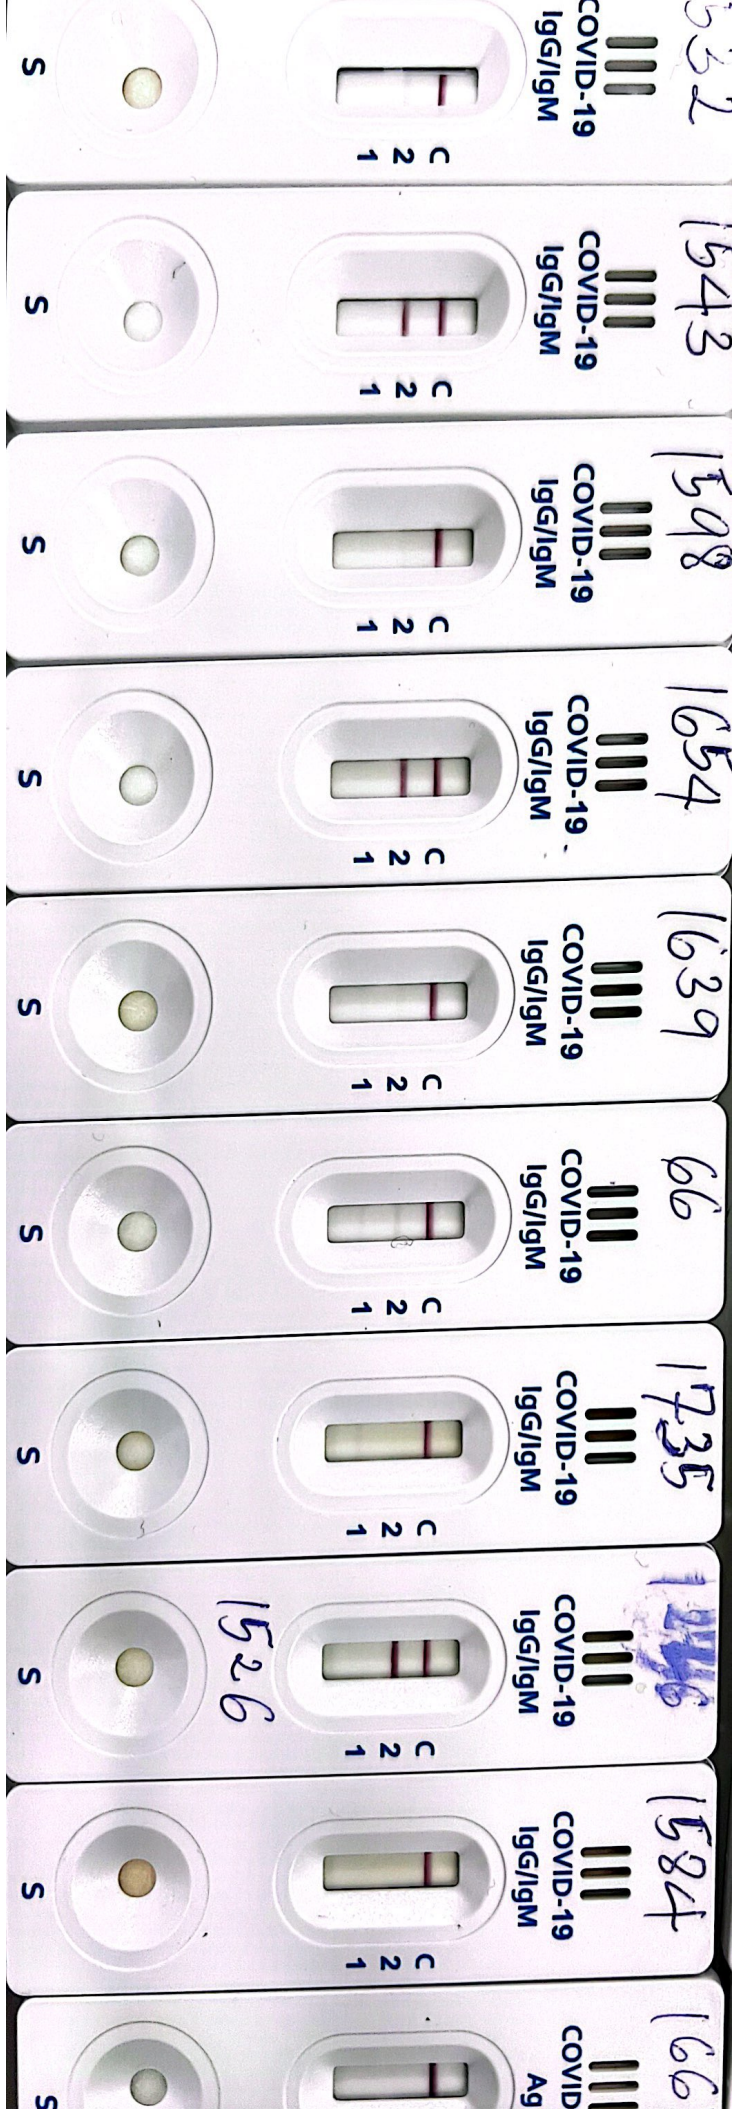



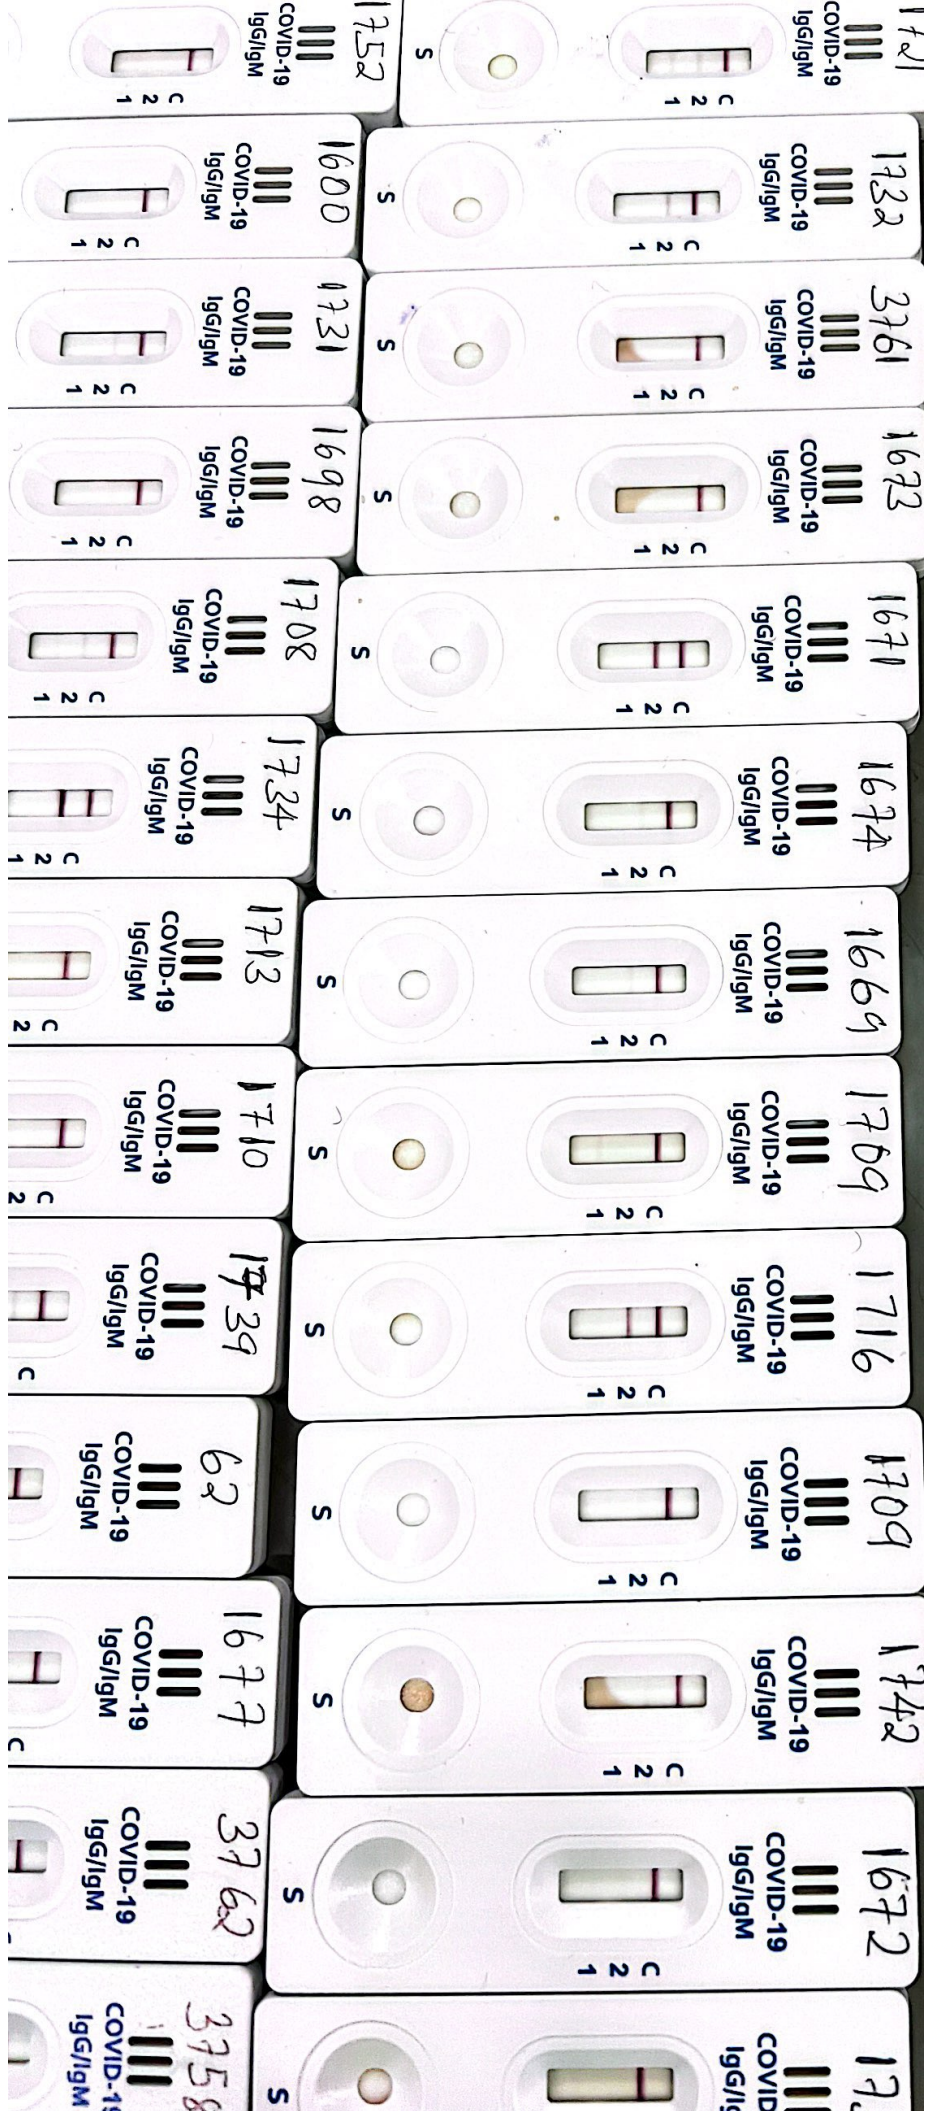



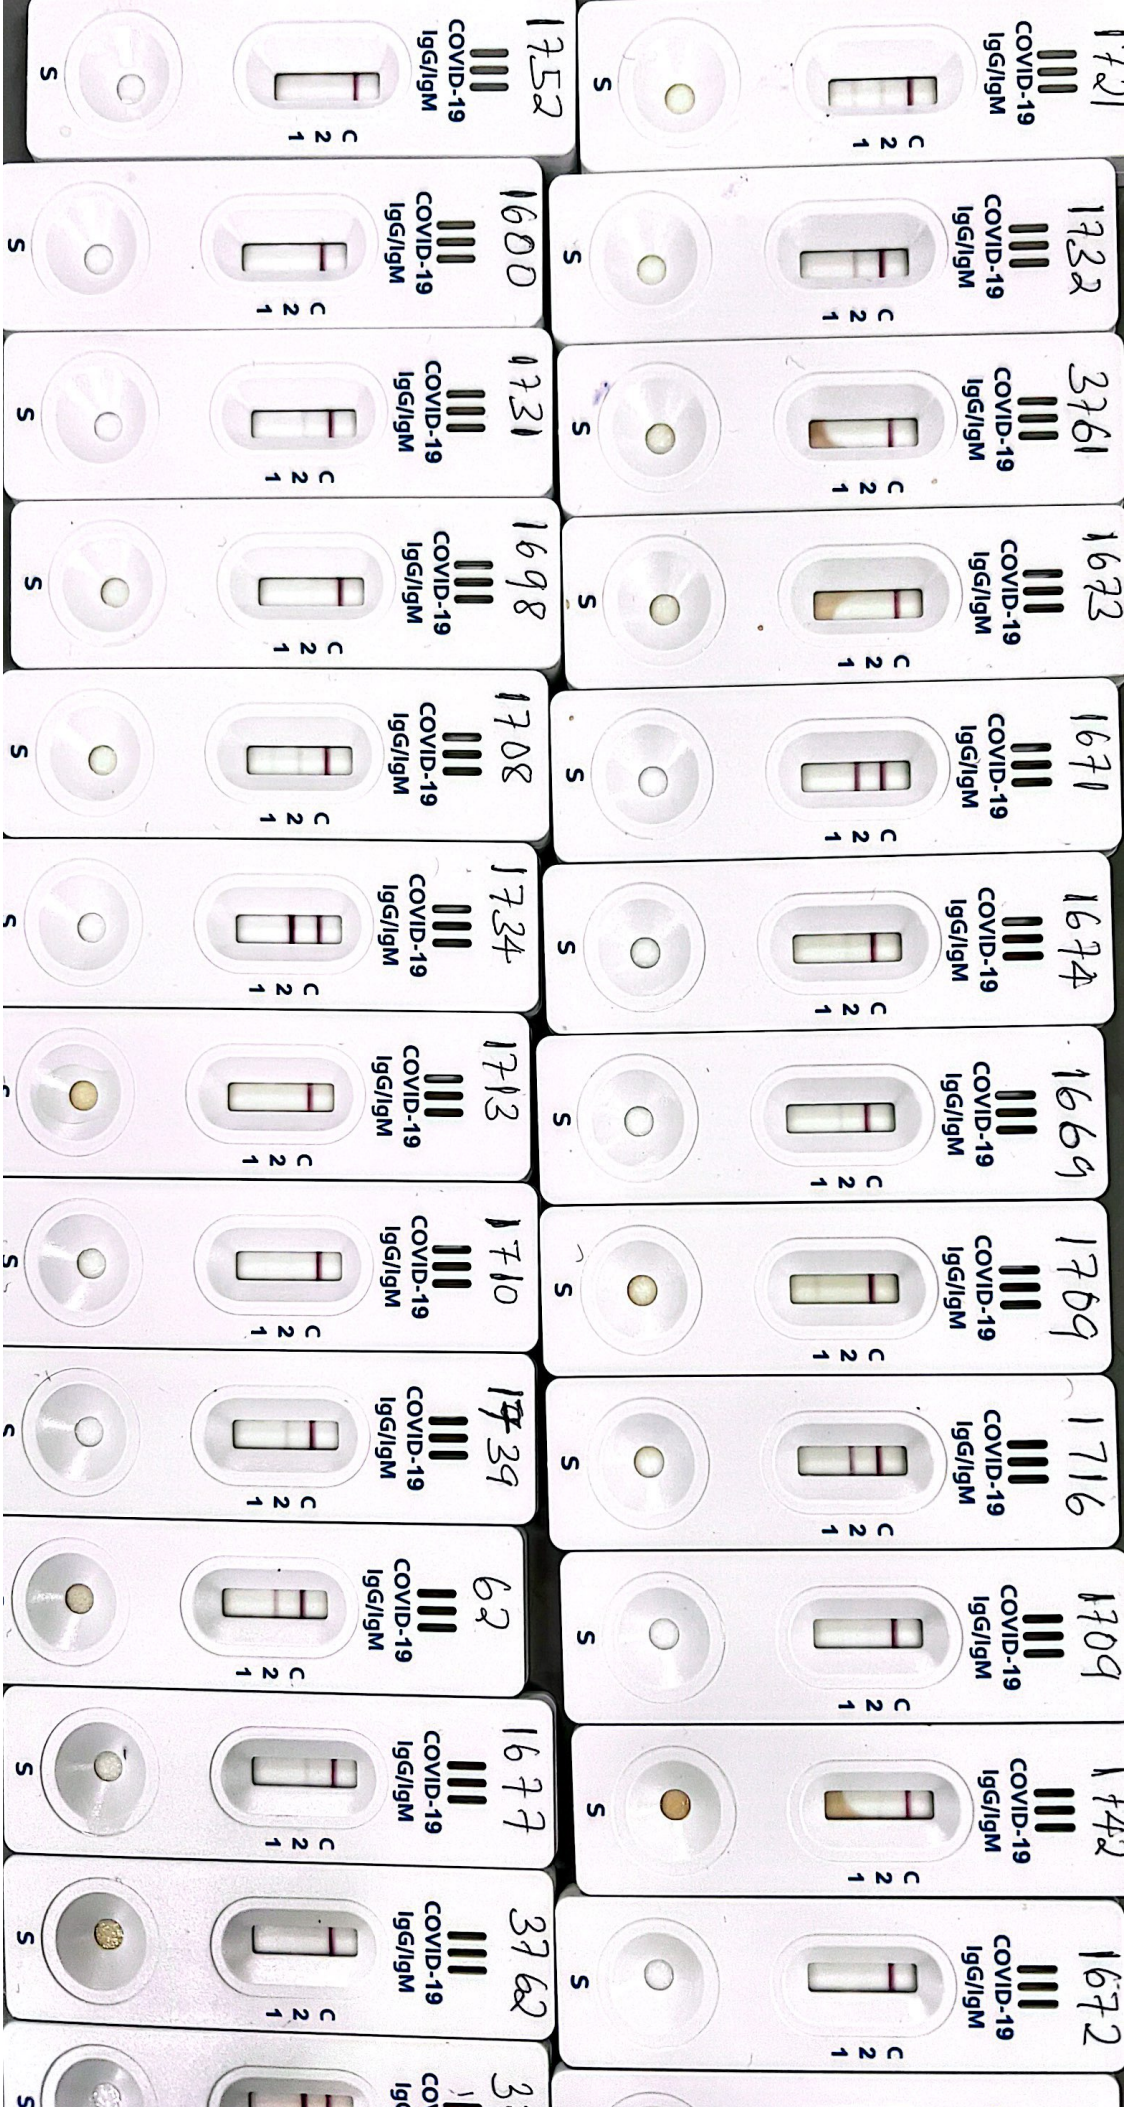



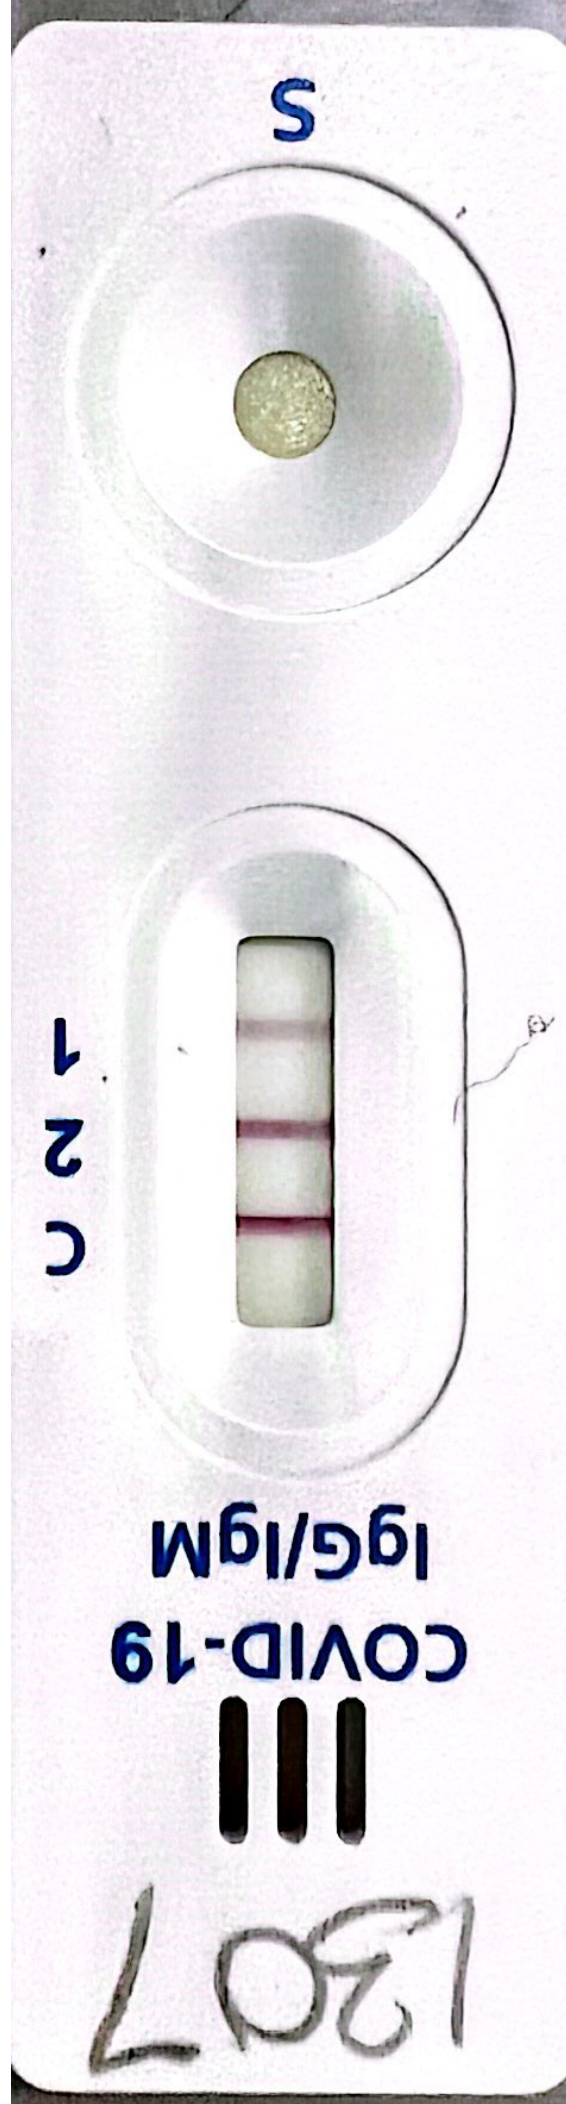

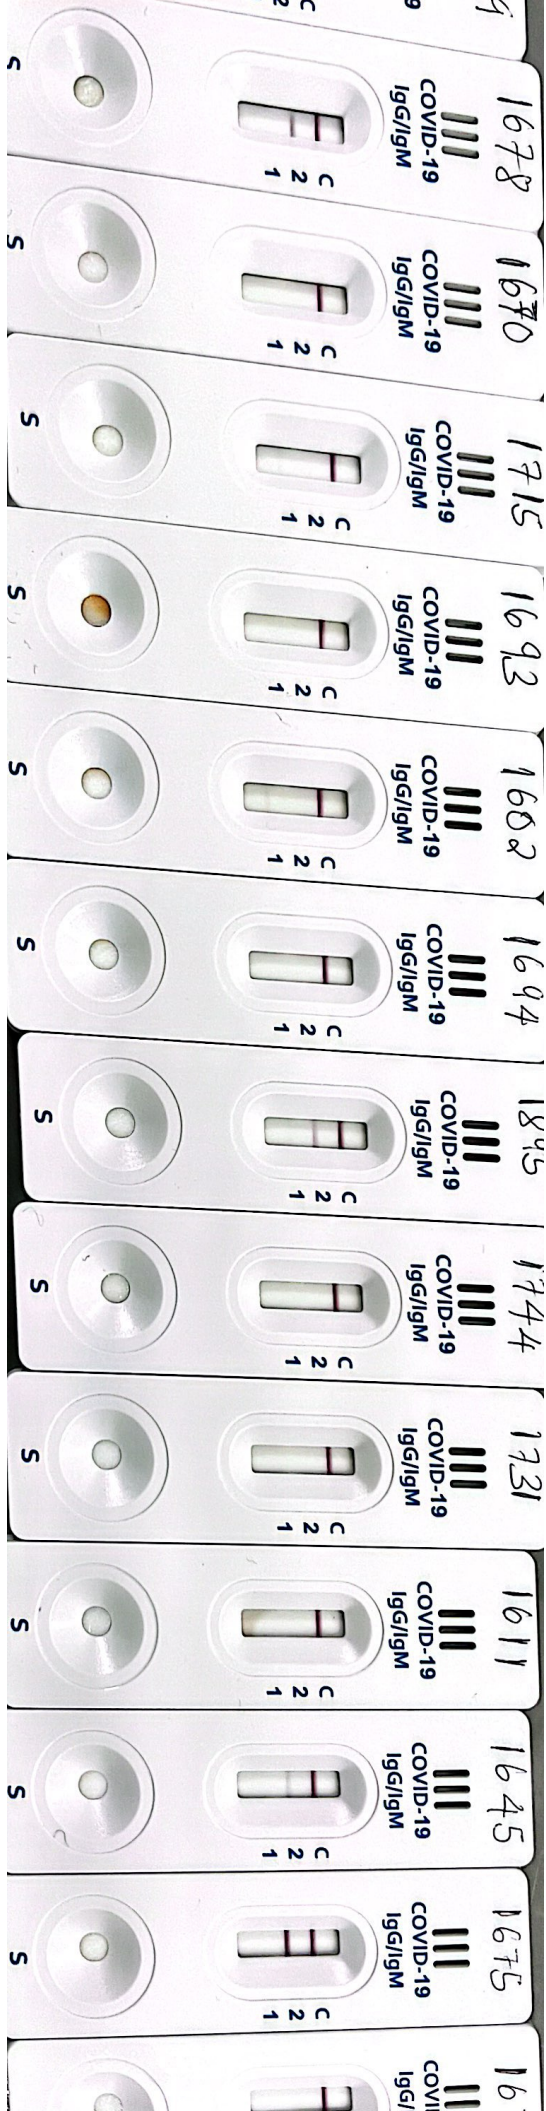

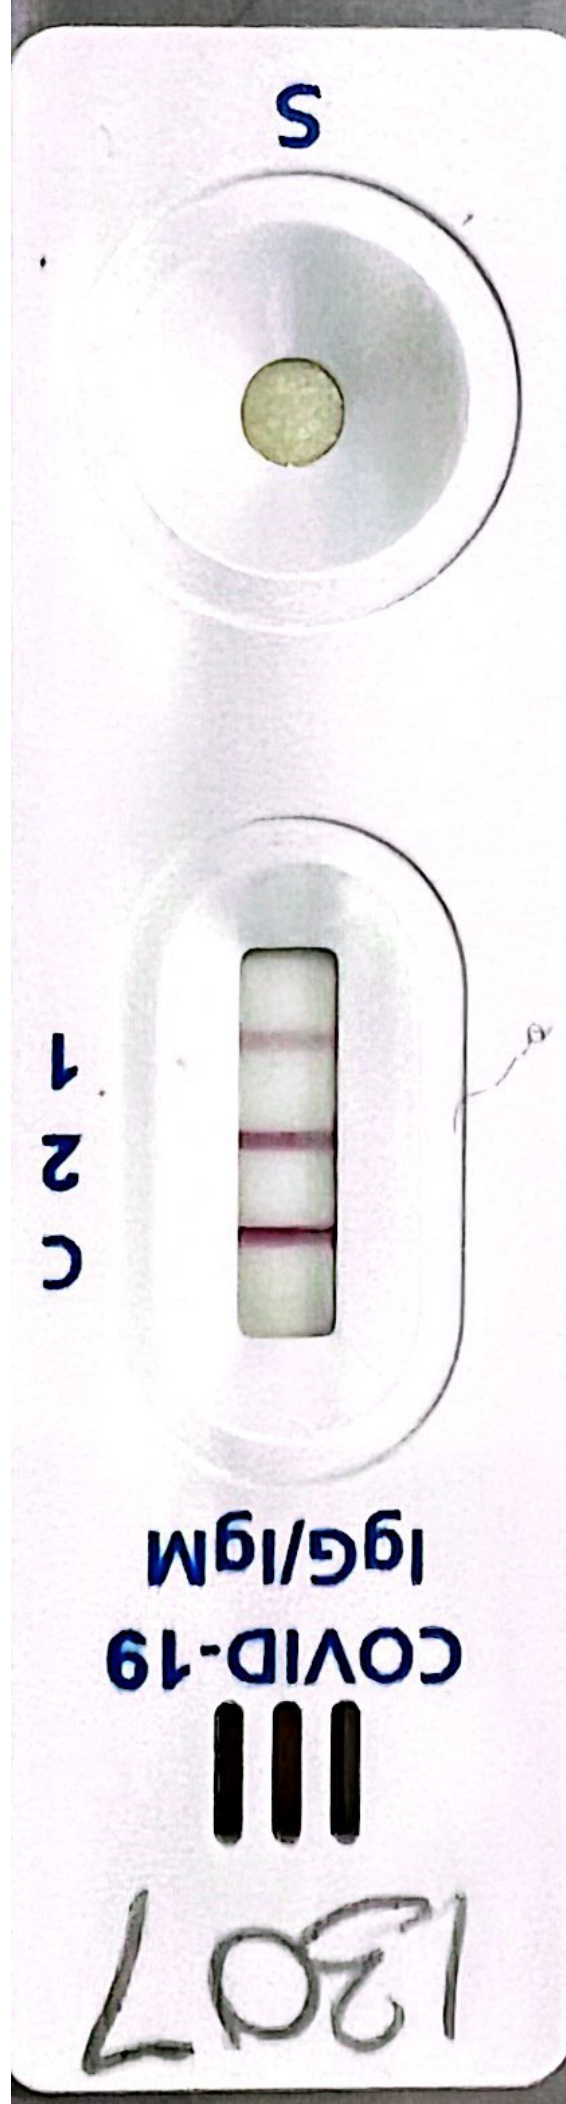



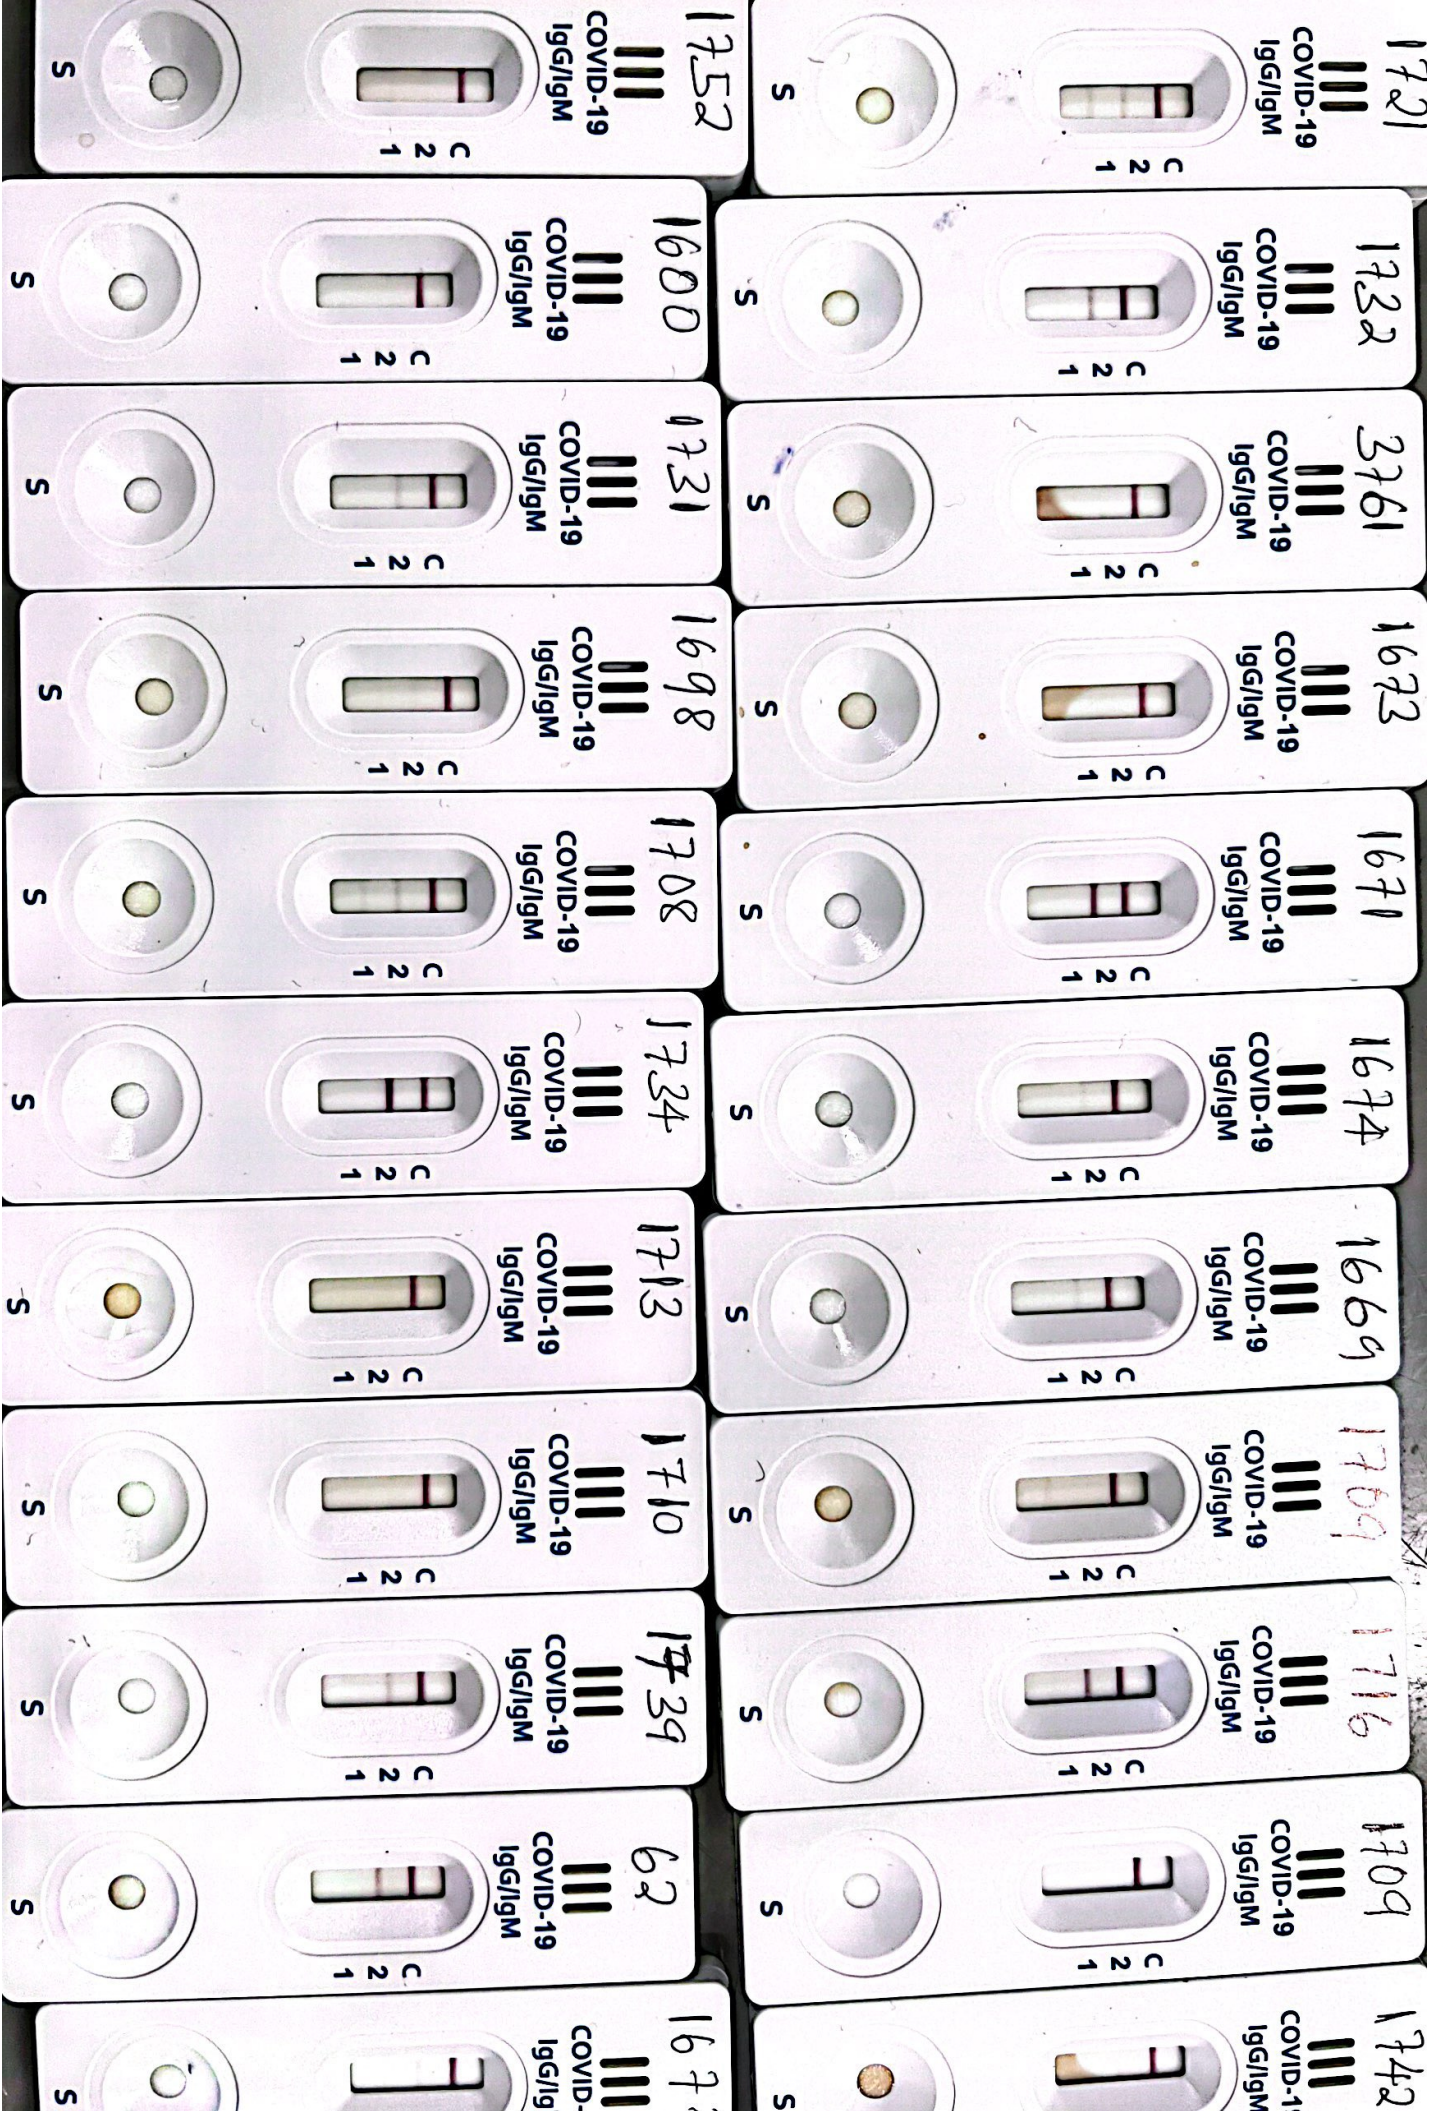

Supplement: s1 [file s1]
